# Supplementary material for: Plastron effect enhanced electrochemical CO2 reduction activity over hydrophobic three-dimensional nanoporous silver
Source: Royal Society of Chemistry journal article supplement (doi:10.1039/d4cc00753k), 2024-01-01
Supplement: d4cc00753k1.pdf [file d4cc00753k1.pdf]

Electronic Supplementary Material (ESI) for ChemComm.

This journal is © The Royal Society of Chemistry 2024

## **Plastron effect enhanced electrochemical CO<sub>2</sub> reduction activity over hydrophobic three-dimensional nanoporous silver**

### **Experimental section**

**Materials.** Silver nitrate(AgNO<sub>3</sub>, 99.9%), Polyvinylpyrrolidone(PVP<sub>k30</sub>, 99%), Potassium bicarbonate (KHCO<sub>3</sub>, 99.5%), Nafion (5 wt%, 99%), Carbon paper (SGL-28BC), Sodium oxalate(Na<sub>2</sub>C<sub>2</sub>O<sub>4</sub>, 99.8%). Potassium hydroxide(KOH, 99.0%), Silver nanoparticles(99.9%), Silver foil (99.999%). All reagents were of analytical grade and used without further purification.

**Characterization.** X-ray diffraction (XRD) patterns of the catalysts were collected on a DX2700 diffractometer with Cu K $\alpha$  radiation ( $\lambda = 1.5406 \text{ \AA}$ ). Under 10kV voltage, the morphology and structure of the catalyst were characterized by S8230 scanning electron microscope (SEM, Hitachi, Japan). The static contact angles of the catalysts were carried out using a SUNZERN contact angle meter (SZ-CAMC11). CO<sub>2</sub> adsorption and desorption test was performed using a QuadraSorb Station 1 specific surface area tester from Conta Instruments, USA, with a degassing temperature of 273 K and a degassing time of 8 hours.

**Synthesis of Ag<sub>2</sub>C<sub>2</sub>O<sub>4</sub>.** First, 0.510 g AgNO<sub>3</sub> was dissolved in 30 ml ultrapure water, stirred, and transferred to a 100 ml three-necked flask. The flask was equipped with a 600 r·min<sup>-1</sup> magnetic stirrer, and the solution was condensed and refluxed at 60 °C. Next, a certain amount of PVP<sub>k30</sub> was dissolved in 10 ml of ultrapure water, stirred, and then added dropwise at a constant rate to the above AgNO<sub>3</sub> solution and then reacted at 60 °C for 1 h. Eventually, 0.201 g Na<sub>2</sub>C<sub>2</sub>O<sub>4</sub> was dissolved in 40 ml of ultrapure water, stirred, and then added dropwise at a constant rate to the above solution and then reacted at 60 °C for 3 h. The product was collected by centrifugation (10 min, 4000 rpm), washed with ultrapure water twice, then with ethanol once, and dried under a vacuum oven.

**Synthesis of AgHN.** To prepare the ink solution, 0.2 mmol of Ag<sub>2</sub>C<sub>2</sub>O<sub>4</sub> were dissolved in 950  $\mu$ L of ethanol. Subsequently, 50  $\mu$ L of 5 wt % Nafion was added as a

binder, followed by ultrasonication for 30 min to ensure homogeneous dispersion. Approximately 100  $\mu\text{L}$  of the ink was uniformly spread over a 1 cm  $\times$  1 cm section of the treated carbon paper and dried at 60  $^{\circ}\text{C}$  for 10 min. The Ag electrocatalyst was obtained by simple electrochemical reduction of  $\text{Ag}_2\text{C}_2\text{O}_4$  by chronoamperometry at a potential of -0.4 V (vs RHE) for 300 s in  $\text{N}_2$ -saturated 0.5 M  $\text{KHCO}_3$ .

**Synthesis of AgHN-VA, AgHN-ETOH, AgHN-VA-ETOH, and AgHN-ETOH-Dry.** All four catalysts were obtained from AgHN by different treatments in a standard H-cell system.

(a) AgHN-VA. After the reduction of  $\text{Ag}_2\text{C}_2\text{O}_4$  to AgHN, the air in the cathode chamber was extracted to expel the gas from the porous structure, the electrode was labeled as AgHN-VA.

(b) AgHN-ETOH. After reducing  $\text{Ag}_2\text{C}_2\text{O}_4$  to AgHN, the electrolyte in the cathode chamber was replaced with ethanol and immersed for some time, and then the ethanol was replaced with electrolyte, and the electrode was noted as AgHN-ETOH.

(c) AgHN-VA-ETOH. After  $\text{Ag}_2\text{C}_2\text{O}_4$  was reduced to AgHN, the electrolyte in the cathode chamber was replaced with ethanol, and then the air in the cathode chamber was extracted. After the extraction was completed, the ethanol was replaced with the electrolyte and extracted again, and the electrode was recorded as AgHN-VA-ETOH.

(d) AgHN-ETOH-Dry. AgHN-VA-ETOH was dried to remove the electrolyte present in the nanopores to obtain AgHN-ETOH-Dry.

**Electrochemical testing.** All of the electrochemical experiments were performed using a standard three-electrode configuration. A saturated KCl solution with Ag/AgCl acted as the reference electrode, and a Pt mesh functioned as the counter electrode. Both working and reference electrodes were positioned in the cathode chamber, with the Pt mesh in the anode chamber. Both chambers were filled with 40 mL of 0.5 M  $\text{KHCO}_3$  and separated by a Nafion 117 membrane. First, the cathode chamber was purged with  $\text{N}_2$  at 40  $\text{mL}\cdot\text{min}^{-1}$  for 30 min to remove residual oxygen. Subsequently, a potential of -0.4 V (vs RHE) was applied to reduce the precursor to obtain the silver electrocatalysts. Eventually,  $\text{CO}_2$  was passed into the electrolyte of the cathode chamber until saturation, followed by the reduction reaction of  $\text{CO}_2$ . All potentials presented were referenced to the reversible standard hydrogen potential (RHE), with corrections implemented by  $iR$ ,  $E(\text{vs RHE}, iR) = E(\text{vs Ag/AgCl}) + 0.197 + 0.0592 \times \text{pH} - iR_u$ .

**Product Analysis.** Gas chromatography (GC 2014 C) was used for periodic analyses at 12-minute intervals at each established potential. This enabled the quantification of CO and H<sub>2</sub> concentrations in the cathode chamber via a hydrogen flame ionization detector (FID1) for CO and CH<sub>4</sub> and a thermal conductivity detector (TCD) for H<sub>2</sub>.

The Faraday efficiencies for CO and H<sub>2</sub> were deduced from the formula:

$$FE(\%) = \frac{n \times z \times F}{I \times t} \times 100\% = \frac{2 \times V \times 10^{-9} \times 96485}{22.4 \times I \times \frac{60}{u}}$$

Within the equation, FE signifies the Faraday efficiency specific to a product; n is the moles (mol) of the CO product; z (equal to 2 in this context) signifies electrons transferred during CO<sub>2</sub> reduction to CO; F is the Faraday constant (96485 C·mol<sup>-1</sup>); I represents the current (A); t stands for the time (in s) required to flow 1 mL of gas; V denotes the quantity of a specific product per 1 mL of feed gas (in ppm); and u indicates the CO<sub>2</sub> gas flow rate (20 mL·min<sup>-1</sup> in this work).

**Electrochemical active surface area (ECSA) Measurement.** The monolayer oxidation method was used to determine the ECSA of the catalysts. The cyclic voltammetry curve of Ag foil was first tested in N<sub>2</sub>-saturated 0.1 M KOH solution, as shown in Fig. S20, which shows three oxidation peaks. It is generally believed that the first peak located at 1.15 V (vs RHE) is the monoatomic layer oxidation peak of silver. This potential is the monoatomic layer oxidation potential of silver. These three Ag catalysts were oxidized at 1.15 V (vs RHE), which was believed to only form a monolayer of Ag<sub>2</sub>O or AgOH, corresponding to a charge of about 400 μC cm<sup>-2</sup>. By comparing the amount of electrons passed during the oxidation process, the relative surface areas between different Ag catalysts can be obtained. Therefore, the specific ECSA of silver-based catalysts can be calculated as follows<sup>1-3</sup>:

$$ECSA = Q_r / (Q_0 * A)$$

where  $Q_r$  is the total amount of charge consumed during the electrochemical oxidation process on different silver-based catalysts,  $Q_0$  is the amount of charge consumed to produce an atomic Ag<sub>2</sub>O or AgOH monolayer ( $Q_0 = 400 \mu\text{C cm}^{-2}$ ) on a smooth silver surface,<sup>1-4</sup>  $A$  is geometric area of the electrodes (cm<sup>2</sup>).

**Electrochemical Impedance Spectroscopy(EIS) Measurement.** EIS measurement was performed in CO<sub>2</sub>-saturated 0.5 M KHCO<sub>3</sub> at an open circuit

potential (OCP) of 0.1 Hz ~ 100 kHz, with an amplitude value of 5 mV of the applied voltage. Data was fitted by the Nova software (version 2.1).

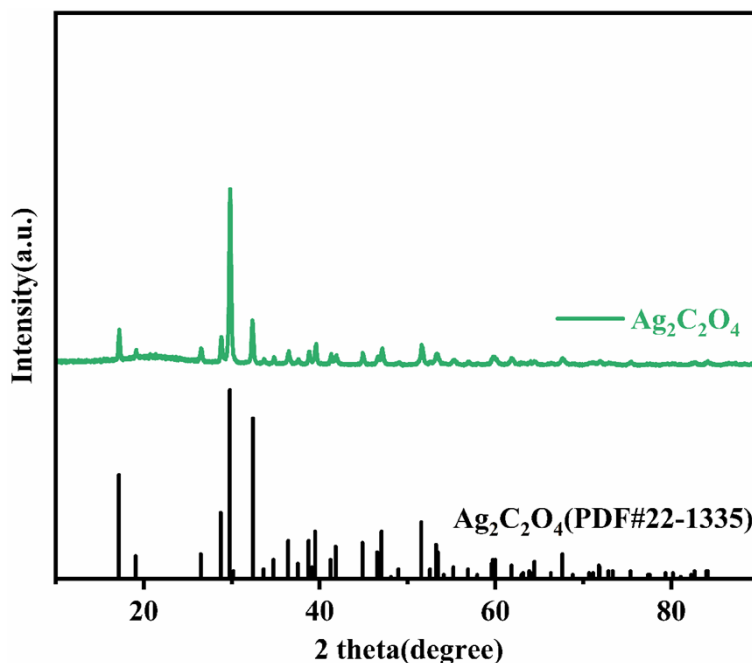

Fig. S1 XRD pattern of  $\text{Ag}_2\text{C}_2\text{O}_4$ .

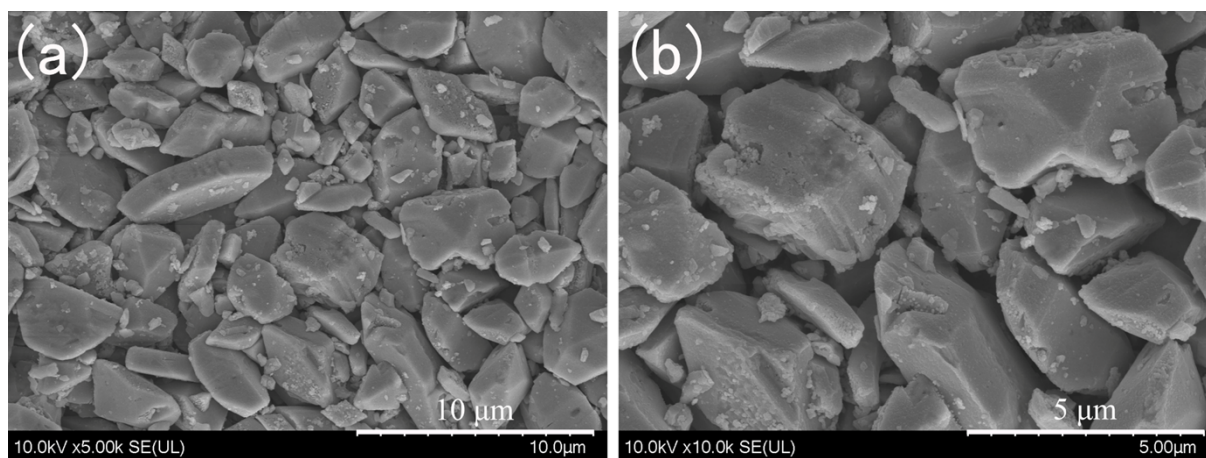

Fig. S2 Low and high magnification SEM images of  $\text{Ag}_2\text{C}_2\text{O}_4$ .

A cyclic voltammetry test was performed in 0.5 M  $\text{KHCO}_3$  saturated with  $\text{N}_2$  to determine the reduction potential for  $\text{Ag}_2\text{C}_2\text{O}_4$  (Fig. S3a). A reduction peak is observed at the potential of about 0.58 V(vs RHE), representing the lowest applied potential for reducing  $\text{Ag}_2\text{C}_2\text{O}_4$  to Ag. The magnitude of the reduction potential falls within the range of 0.70 V - 0.50 V, which implies that  $\text{Ag}_2\text{C}_2\text{O}_4$  can be reduced to Ag with reduction potentials lower than 0.50 V (vs RHE). To obtain a quick reduction, we chose -0.4 V(vs RHE) as the reduction potential.

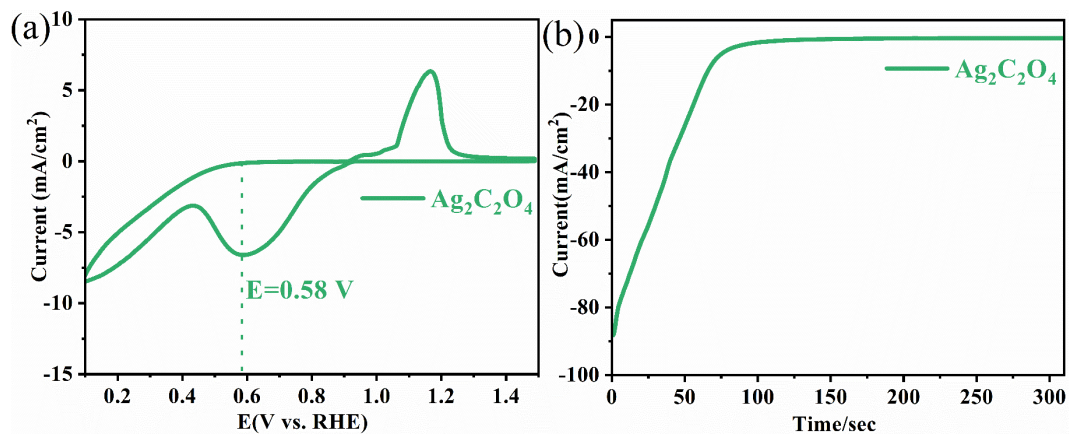

**Fig. S3** (a) Cyclic voltammetry curve of  $\text{Ag}_2\text{C}_2\text{O}_4$  in 0.5 M  $\text{KHCO}_3$  saturated with  $\text{N}_2$ .  
 (b) i-t diagram of the reduction of  $\text{Ag}_2\text{C}_2\text{O}_4$  to AgHN.

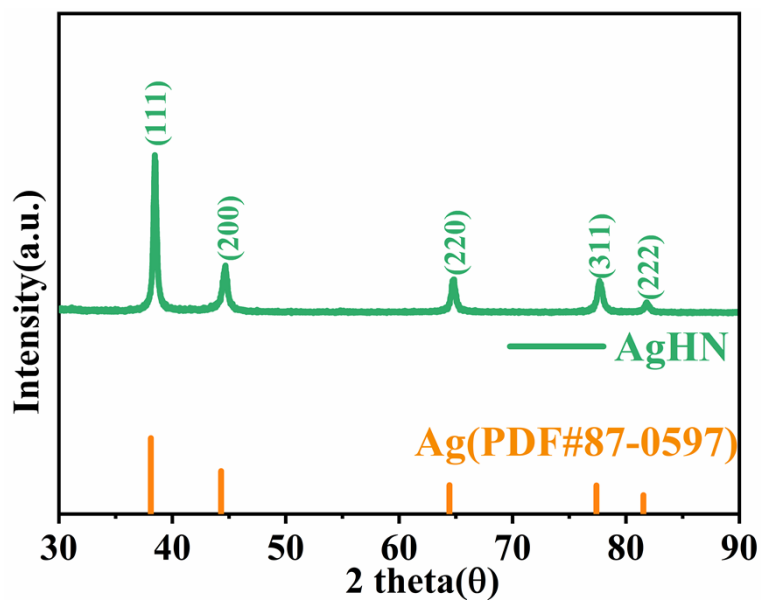

**Fig. S4** XRD pattern of AgHN.

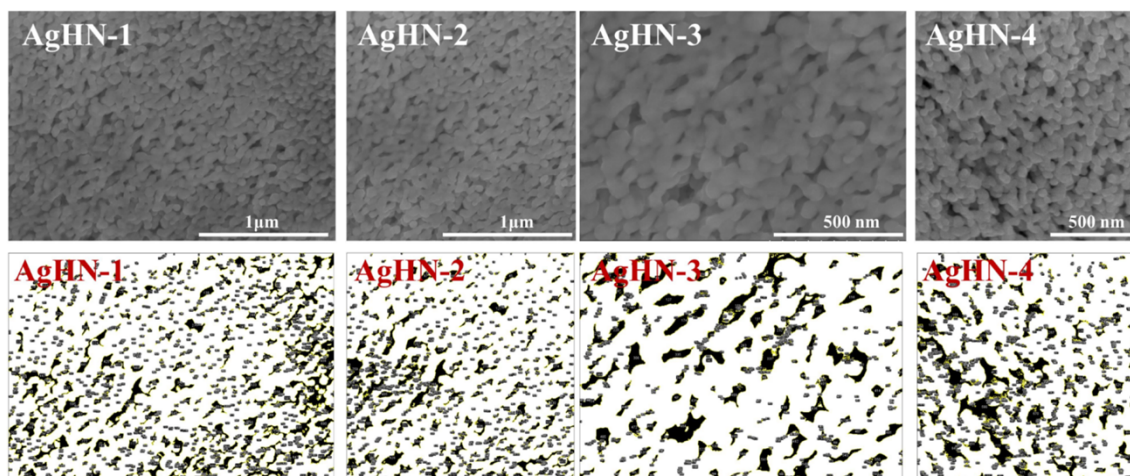

**Fig. S5** Pore distribution map of AgHN.

**Table S1** The porosity of AgHN.

| Catalyst | Number of pores | Hole area | Total area | Porosity (%) |
|----------|-----------------|-----------|------------|--------------|
| AgHN-1   | 759             | 117201    | 802816     | 14.599       |
| AgHN-2   | 622             | 179789    | 1149440    | 15.641       |
| AgHN-3   | 1039            | 69375     | 404471     | 17.152       |
| AgHN-4   | 1029            | 190220    | 1146880    | 16.586       |

AgHN-X(X=1,2,3,and 4) represents different regions of the same AgHN.

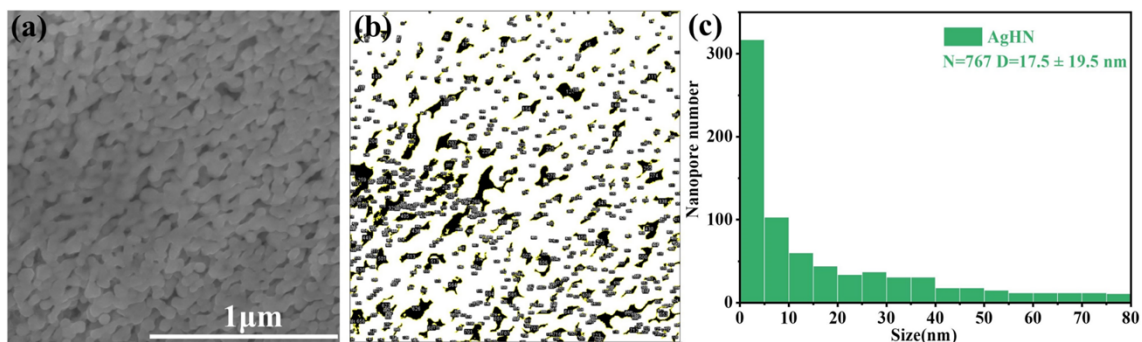

**Fig. S6** Pore size distribution map of AgHN.

XRD and SEM images of Ag foil and AgNPs are shown in Fig. S7 and Fig. S8. The static contact angles of Ag foil, AgNPs, and AgHN are shown in Fig. S9, and it can be seen that Ag foil is hydrophilic in both CO<sub>2</sub>-saturated 0.5 M KHCO<sub>3</sub> and water, while both AgNPs and AgHN are hydrophobic.

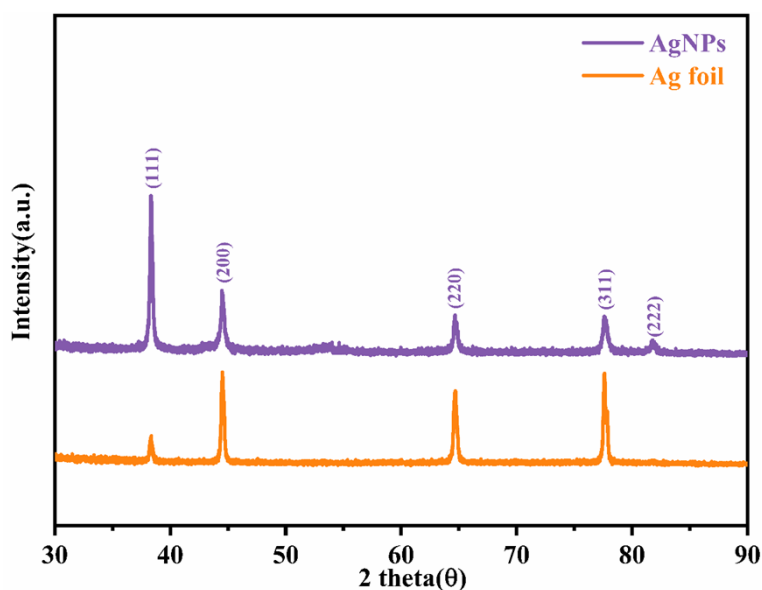

**Fig. S7** XRD patterns of AgNPs and Ag foil.

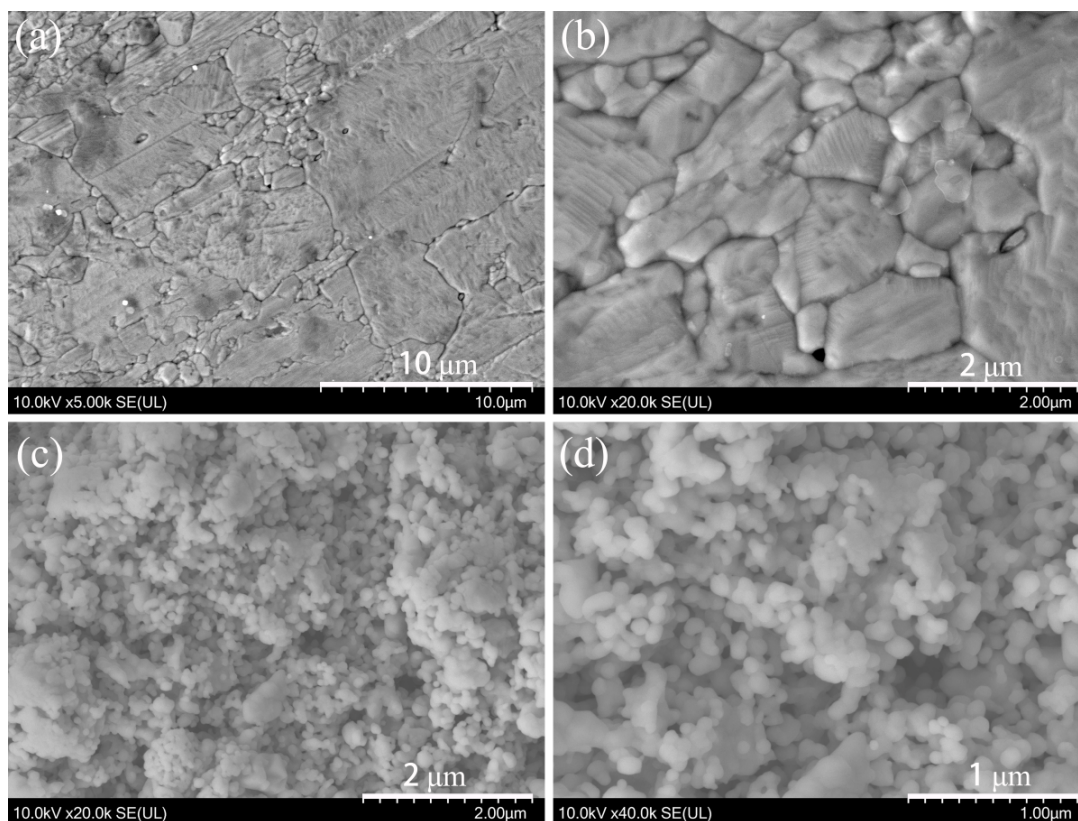

**Fig. S8** SEM images of Ag foil(a,b) and AgNPs(c,d).

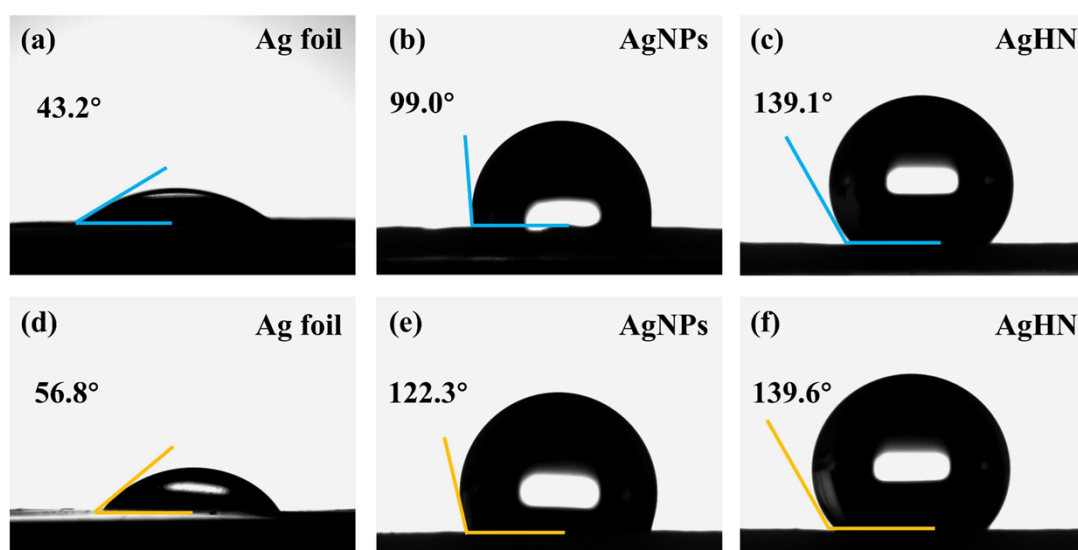

**Fig. S9** Static contact angles of Ag foil(a), AgNPs(b), and AgHN(c) in water. Static contact angles of Ag foil(d), AgNPs(e), and AgHN(f) using CO<sub>2</sub>-saturated 0.5 M KHCO<sub>3</sub> as the liquid.

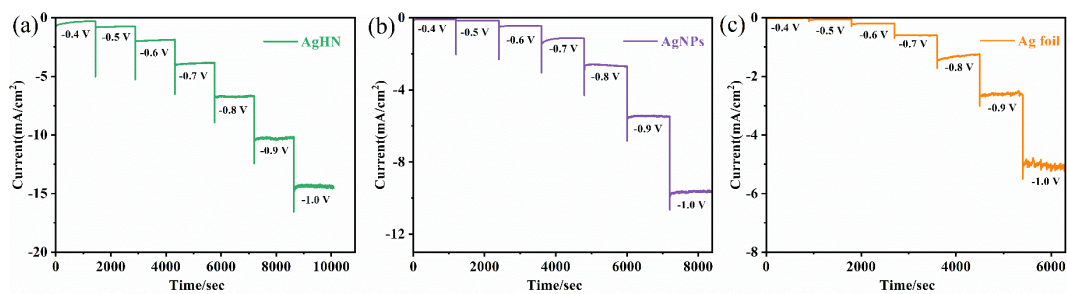

**Fig. S10** The i-t curves of AgHN(a), AgNPs(b), and Ag foil(c).

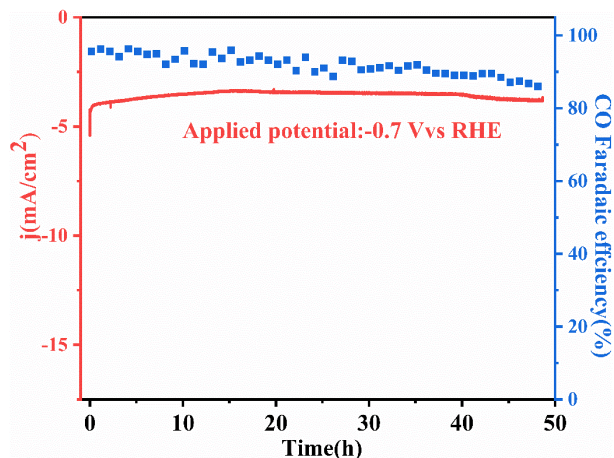

**Fig. S11** Recorded chronoamperometric curve from AgHN at  $-0.7$  V versus RHE over a 48 h period and the corresponding  $FE_{CO}$ .

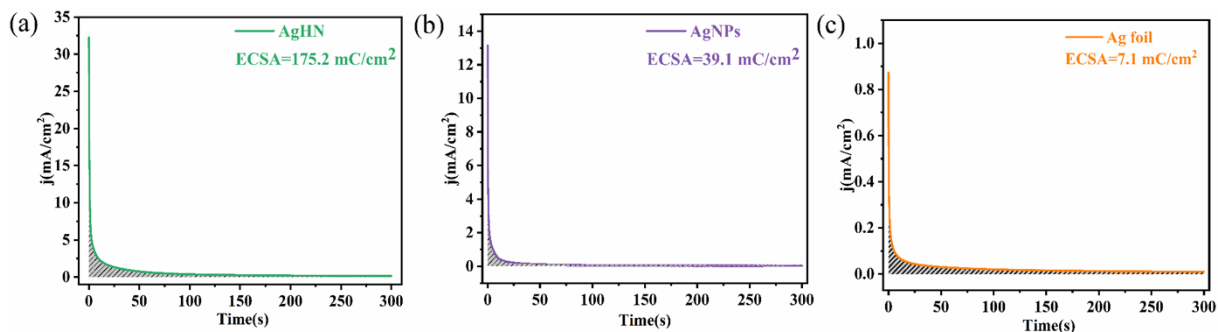

**Fig. S12** ECSA of AgHN(a), AgNPs(b), and Ag foil(c).

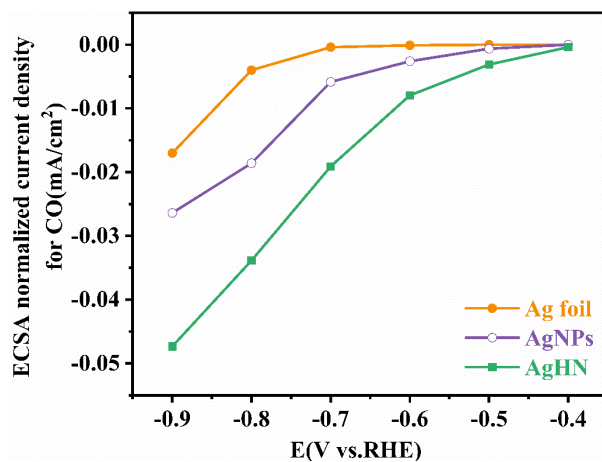



**Fig. S13** Potential dependence of ECSA normalized current density for CO on the AgHN, AgNPs, and Ag foil.

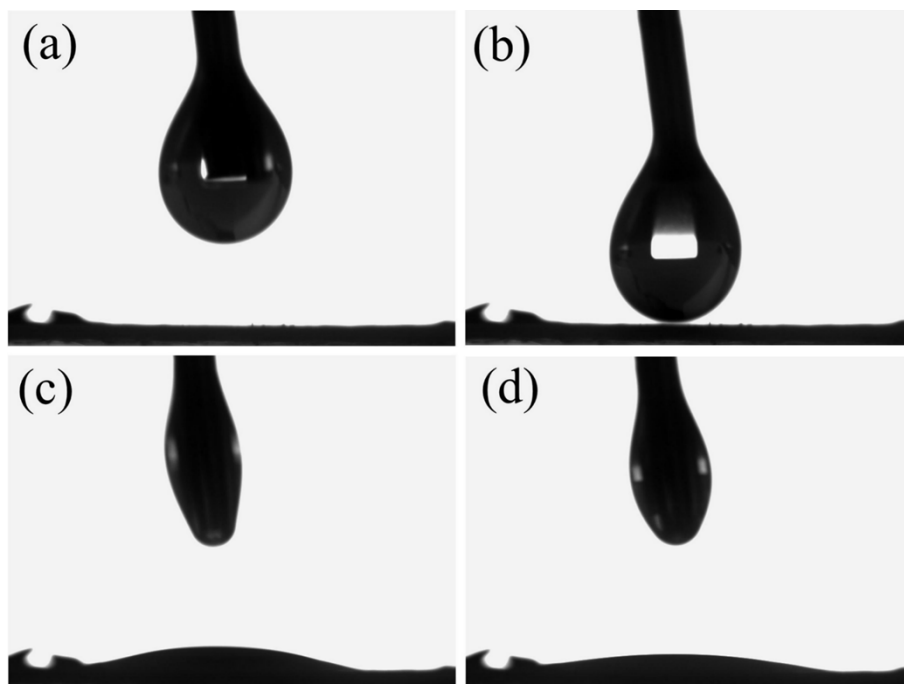

**Fig. S14** Static contact angle of AgHN under ethanol.

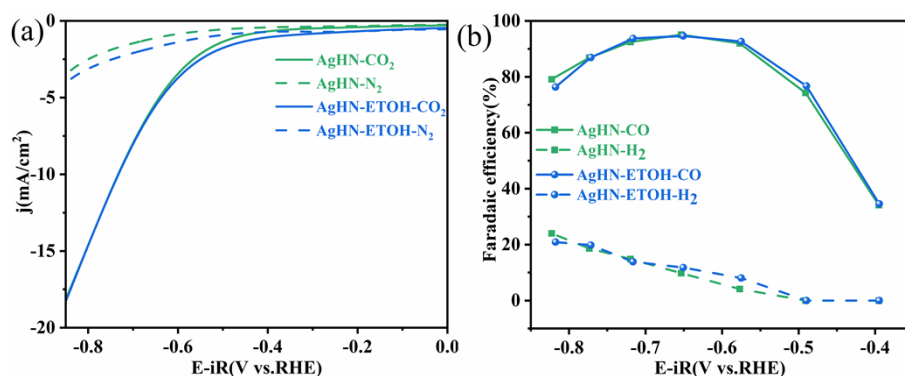

**Fig. S15** Comparison of catalytic performance of AgHN-ETOH and AgHN, (a)LSV, (b)FE.

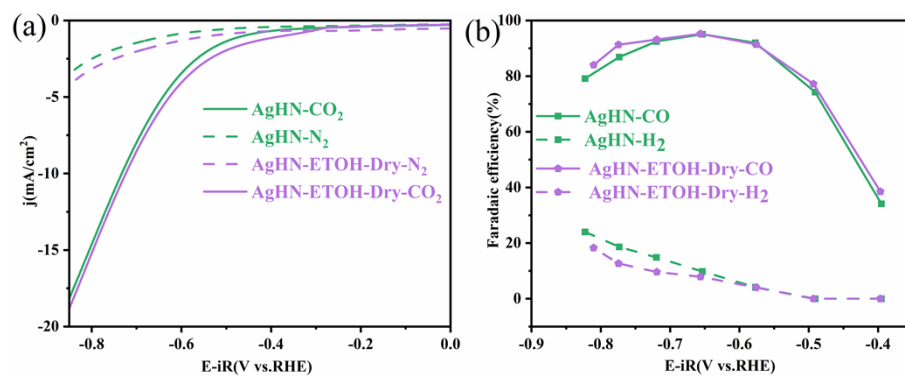

**Fig. S16** Comparison of catalytic performance of AgHN-ETOH-Dry and AgHN,

(a)LSV, (b)FE.

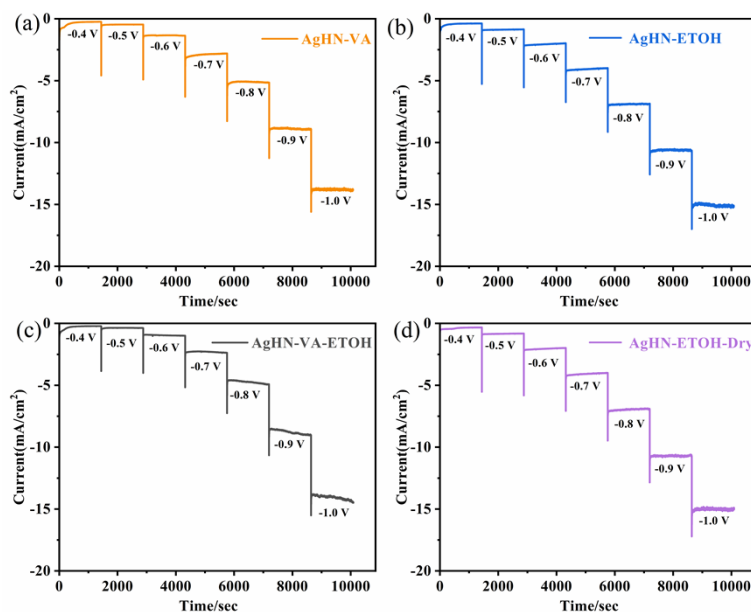

**Fig. S17** The i-t curves of AgHN-VA(a), AgHN-ETOH(b), AgHN-VA-ETOH(c), and AgHN-ETOH-Dry(d).

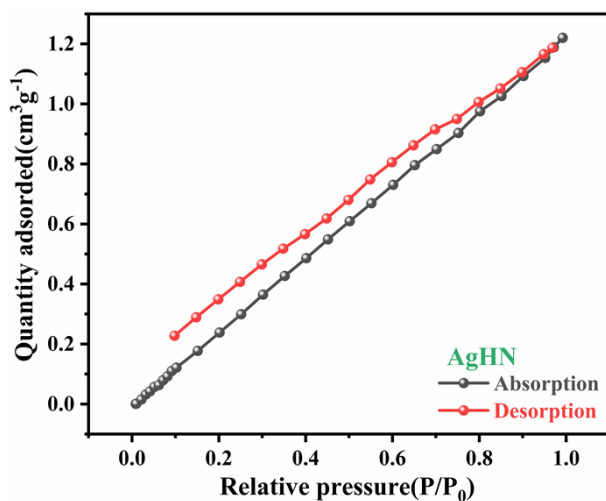

**Fig. S18** CO<sub>2</sub> adsorption-desorption isotherms curve of AgHN at 273 K.

The static contact angles of AgHN, Ag-VA-ETOH, AgHN-VA, and AgHN-ETOH-Dry are shown in Fig. S19. When the nanopores of AgHN are filled with ethanol or electrolyte, the static contact angle decreases. The static contact angle of AgHN-VA is 100.1°, while that of AgHN-VA-ETOH is 43.5°. When AgHN-VA-ETOH was dried to obtain AgHN-ETOH-Dry, its static contact angle increased(140.4°) and approached that of AgHN(139.6°).

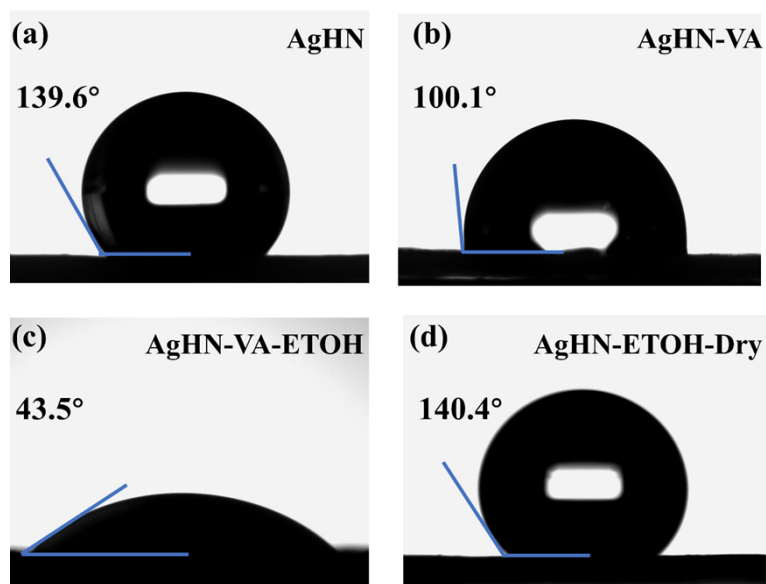

**Fig. S19** Static contact angles of AgHN(a), AgHN-VA(b), AgHN-VA-ETOH(c), and AgHN-ETOH-Dry(d) using CO<sub>2</sub>-saturated 0.5 M KHCO<sub>3</sub> as the liquid.

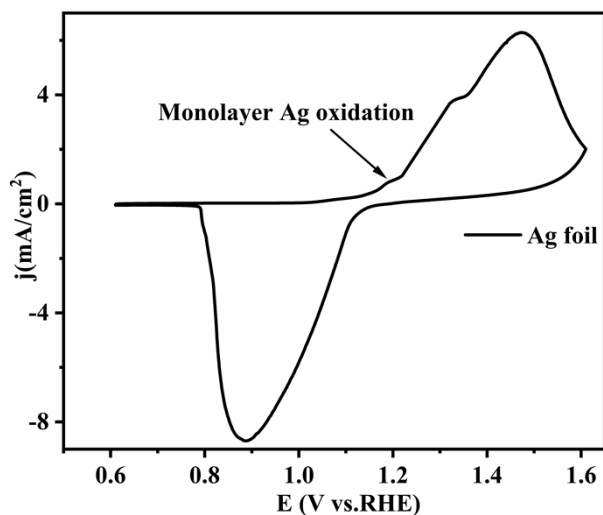

**Fig. S20** Cyclic voltammetry of Ag foil in N<sub>2</sub>-saturated 0.1 M KOH.

- 1 K. Ye, T. Liu, Y. Song, Q. Wang and G. Wang, *Applied Catalysis B: Environmental*, 2021, **296**, 120342.
- 2L. Wei, H. Li, J. Chen, Z. Yuan, Q. Huang, X. Liao, G. Henkelman and Y. Chen, *ACS Catal.*, 2020, **10**, 1444–1453.
- 3Q. Lu, J. Rosen, Y. Zhou, G. S. Hutchings, Y. C. Kimmel, J. G. Chen and F. Jiao, *Nat Commun*, 2014, **5**, 3242.
- 4J. Gomez Berra, R. C. Salvarezza and A. J. Arvia, *Electrochimica Acta*, 1988, **33**, 1431–1437.
